# Supplementary material for: Connection between Variations of the Probability Distribution of the Recurrence Time and Phases of the Seismic Activity
Source: Preprints.org preprint supplement (doi:10.20944/preprints202309.0717.v1), 2023-09-12
Supplement: Supplementary file 1 [file supplementary]

# Supplementary Materials: Connection between variations of the probability distribution of the recurrence time and phases of the seismic activity

Elisa Varini <sup>1,†,‡</sup>  and Renata Rotondi <sup>2,†,‡</sup> 

## 1. Further remarks on the results

In addition to establishing the one that has the greatest posterior marginal likelihood as the best model among the four probability distributions of the recurrence time under examination, we also want to assign the degree of evidence of that model with respect to the others; to do this, in analogy to the Bayes factor, we compare the pairwise difference  $\log B_{ij}$  between the posterior marginal log-likelihood of the model  $H_i$  and that of the model  $H_j$  with the  $\mathcal{K}$  values of the Jeffreys scale, where  $\log B_{ij} = \log \mathcal{L}(f_i(\tau)) - \log \mathcal{L}(f_j(\tau))$ ,  $i, j = 1, \dots, 4, i \neq j$ . In Table S1 we recall these values expressed in natural logarithmic scale [1].

**Table S1.** Values of the Jeffreys scale

| $\mathcal{K}$    | Evidence of $H_i$ against $H_j$    |
|------------------|------------------------------------|
| 0 to 1.1513      | Not worth more than a bare mention |
| 1.1513 to 2.3026 | Substantial                        |
| 2.3026 to 4.6052 | Strong                             |
| > 4.6052         | Decisive                           |

Hereafter we denote the four probability distributions under consideration in the following way:  $q$ -exponential distribution by  $H_1$  (red),  $q$ -generalized gamma distribution by  $H_2$  (green), gamma distribution by  $H_3$  (blue), and exponential distribution by  $H_4$  (gray).

### 1.1. L'Aquila case

We recall that the strength of the evidence in favor of the best distribution with respect to the second best model is strong just in about half of the time windows. Figure S1 shows the value of the differences  $B_{1j}$ ,  $j = 2, 3, 4$  in correspondence to the time windows in which the  $q$ -exponential probability distribution is the best model; the color of the dots corresponds to the model  $H_j$ . The top panel highlights the time windows in which the evidence is more than strong in favor of  $H_1$ , while the bottom panel is divided between the values of  $\log B_{1j}$  exceeding  $\mathcal{K} = 1.1513$  (dotted line) which indicate substantial evidence and the values belonging to  $(0, 1.1513)$  corresponding to barely noteworthy evidence against  $H_j$ . Figures S2 and S3 show analogous results for time windows where the best model is the  $q$ -generalized gamma distribution and the gamma distribution, respectively.

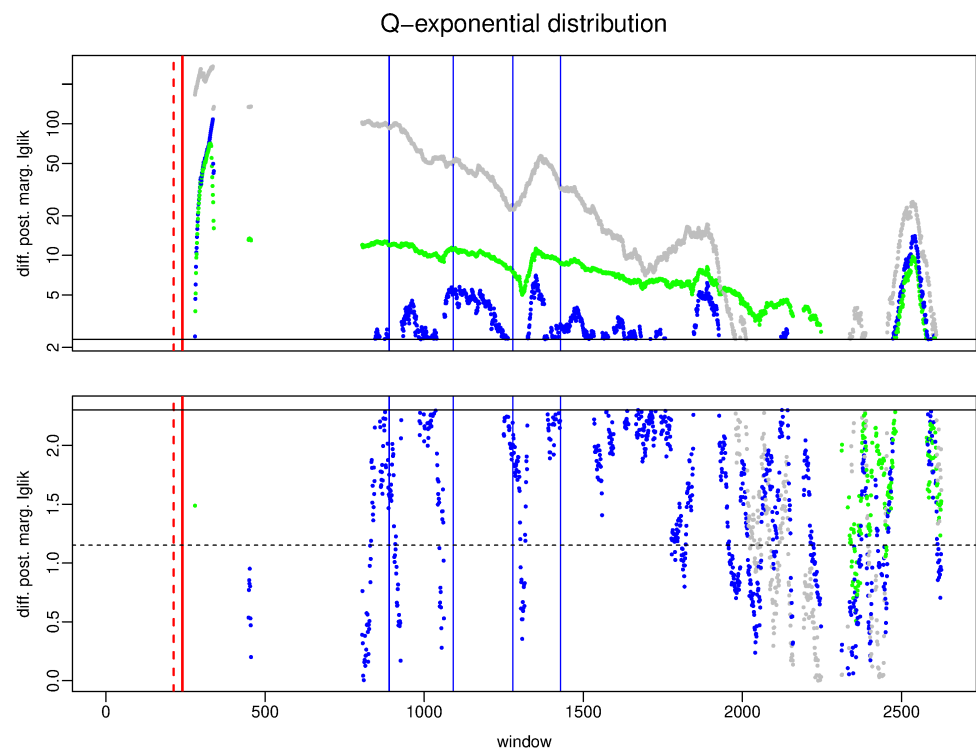

**Figure S1.** L'Aquila case - Differences between the posterior marginal log-likelihoods of the  $q$ -exponential and of the other distributions in the time windows in which the  $q$ -exponential distribution is the best model. The values in the top panel, in the bottom panel above and below the dotted line ( $\mathcal{K} = 1.1513$ ) correspond to more than strong, substantial and barely noteworthy evidence in favor of the  $q$ -exponential model respectively. Vertical bars indicate the occurrence time of the 2009/03/30  $M_w$  4 earthquake (red dashed line), L'Aquila  $M_w$  6.1 earthquake (red solid line), events of  $5.0 \leq M_w < 5.5$  (blue line).

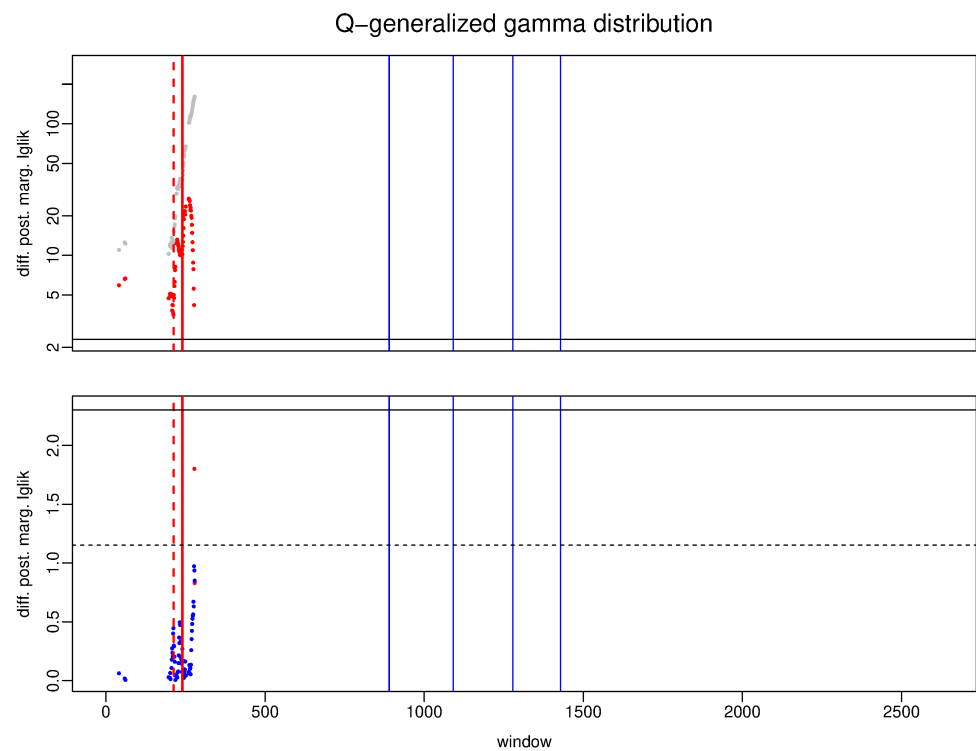

**Figure S2.** L'Aquila case - Differences between the posterior marginal log-likelihoods of the  $q$ -generalized gamma and of the other distributions in the time windows in which the  $q$ -generalized gamma distribution is the best model. The values in the top panel, in the bottom panel above and below the dotted line ( $\mathcal{K} = 1.1513$ ) correspond to more than strong, substantial and barely noteworthy evidence in favor of the  $q$ -generalized gamma model respectively. Vertical bars indicate the occurrence time of the 2009/03/30  $M_w$  4 earthquake (red dashed line), L'Aquila  $M_w$  6.1 earthquake (red solid line), events of  $5.0 \leq M_w < 5.5$  (blue line).

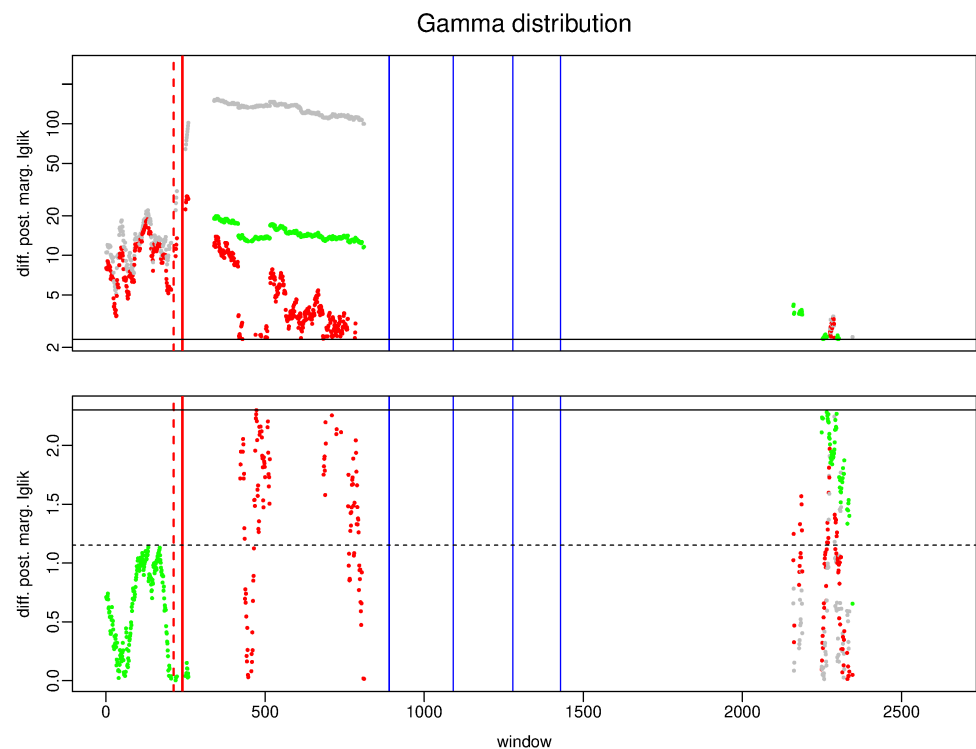

**Figure S3.** L'Aquila case - Differences between the posterior marginal log-likelihoods of the gamma and of the other distributions in the time windows in which the gamma distribution is the best model. The values in the top panel, in the bottom panel above and below the dotted line ( $\mathcal{K} = 1.1513$ ) correspond to more than strong, substantial and barely noteworthy evidence in favor of the gamma model respectively. Vertical bars indicate the occurrence time of the 2009/03/30  $M_w$  4 earthquake (red dashed line), L'Aquila  $M_w$  6.1 earthquake (red solid line), events of  $5.0 \leq M_w < 5.5$  (blue line).

## 2. Amatrice-Norcia sequence

We recall that the strength of the evidence in favor of the best distribution with respect to the second best model is strong or decisive just in about a third of the time windows, in which the outperforming distribution is especially  $q$ -exponential or gamma. As in the case of L'Aquila sequence Figures S4, S5, S6 show the values of  $\log B_{ij}$ ,  $i = 1, 2, 3$ , in correspondence of the time windows in which the best model  $H_i$  has more than strong (top panel), substantial (upper part of the bottom panel) and barely noteworthy evidence (lower part of the bottom panel) against  $H_j$ ,  $i \neq j$ .

23  
24  
25  
26  
27  
28  
29  
30

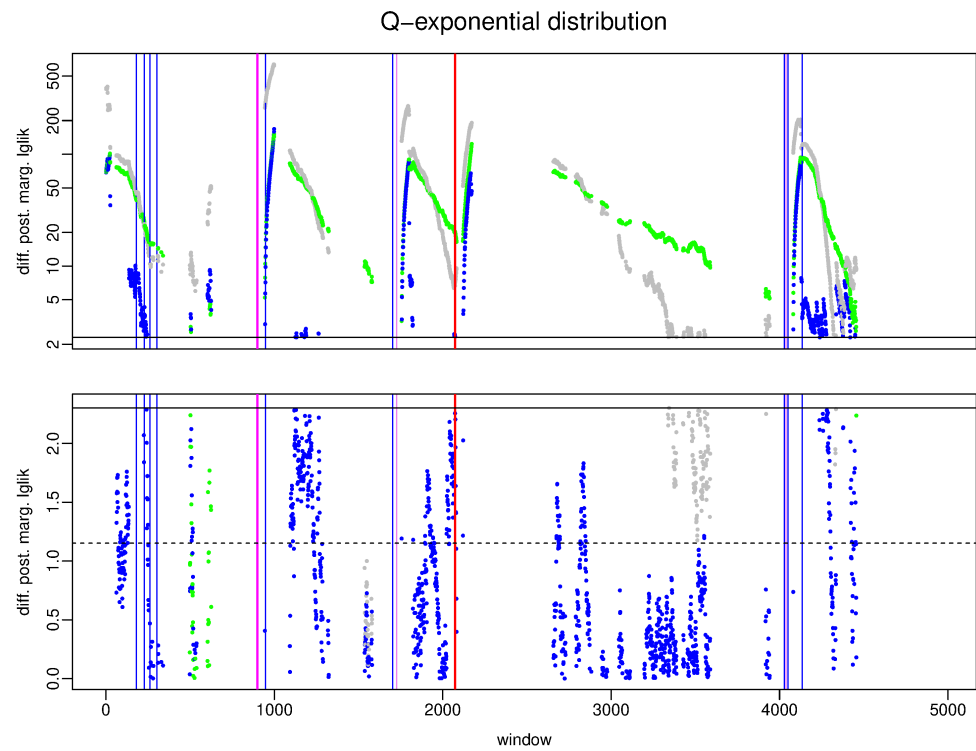

**Figure S4.** Amatrice-Norcia case - Differences between the posterior marginal log-likelihoods of the  $q$ -exponential and of the other distributions in the time windows in which the  $q$ -exponential distribution is the best model. The values in the top panel, in the bottom panel above and below the dotted line ( $\mathcal{K} = 1.1513$ ) correspond to more than strong, substantial and barely noteworthy evidence in favor of the  $q$ -exponential model respectively. Vertical bars indicate the occurrence time of Amatrice 2016/08/24  $M_w$  6.0 earthquake (magenta line), Norcia 2016/10/30  $M_w$  6.5 earthquake (red line), events of  $5.0 \leq M_w < 5.5$  (blue line) and of  $5.5 \leq M_w < 6.0$  (violet line).

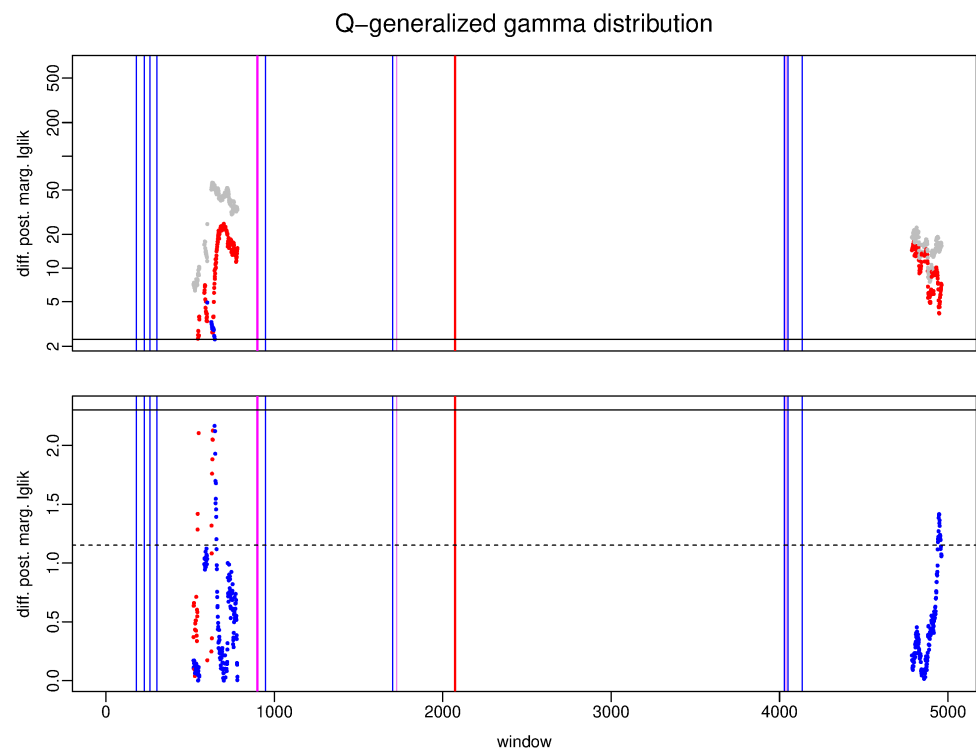

**Figure S5.** Amatrice-Norcia case - Differences between the posterior marginal log-likelihoods of the  $q$ -generalized gamma and of the other distributions in the time windows in which the  $q$ -generalized gamma distribution is the best model. The values in the top panel, in the bottom panel above and below the dotted line ( $\mathcal{K} = 1.1513$ ) correspond to more than strong, substantial and barely noteworthy evidence in favor of the  $q$ -generalized gamma model respectively. Vertical bars indicate the occurrence time of Amatrice 2016/08/24  $M_w$  6.0 earthquake (magenta line), Norcia 2016/10/30  $M_w$  6.5 earthquake (red line), events of  $5.0 \leq M_w < 5.5$  (blue line) and of  $5.5 \leq M_w < 6.0$  (violet line).

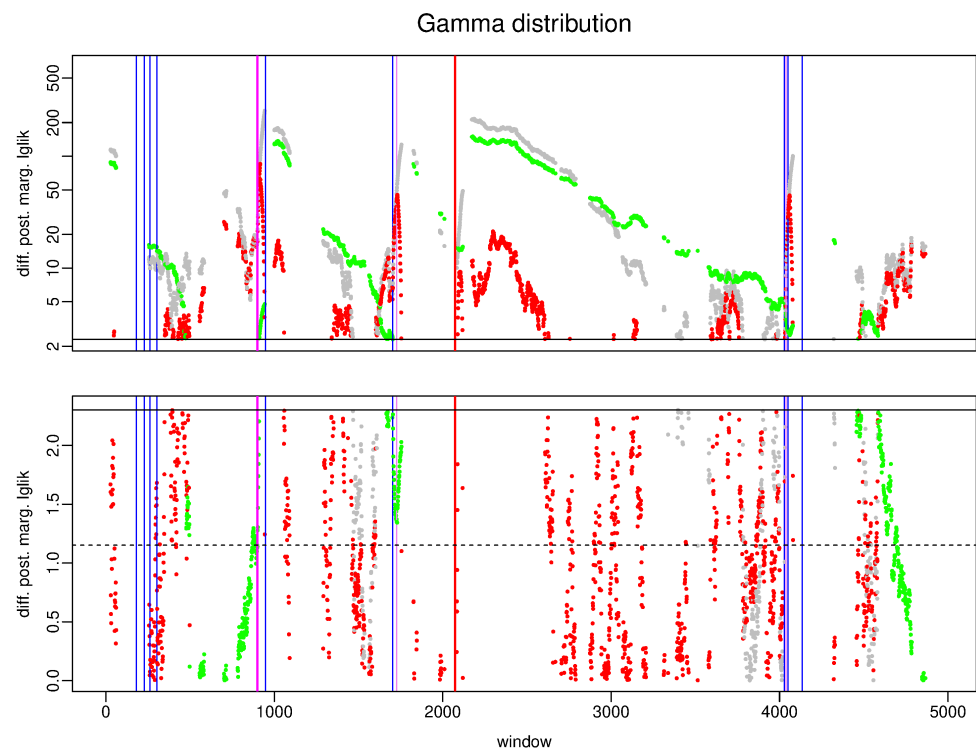

**Figure S6.** Amatrice-Norcia case - Differences between the posterior marginal log-likelihoods of the gamma and of the other distributions in the time windows in which the gamma distribution is the best model. The values in the top panel, in the bottom panel above and below the dotted line ( $\mathcal{K} = 1.1513$ ) correspond to more than strong, substantial and barely noteworthy evidence in favor of the gamma model respectively. Vertical bars indicate the occurrence time of Amatrice 2016/08/24  $M_w$  6.0 earthquake (magenta line), Norcia 2016/10/30  $M_w$  6.5 earthquake (red line), events of  $5.0 \leq M_w < 5.5$  (blue line) and of  $5.5 \leq M_w < 6.0$  (violet line).

## References

1. Kass, R.E.; Raftery, A.E. Bayes factor, **1995**, *J. Am. Stat. Ass.*, **90**, 430, 773–795, doi=10.2307/2291091.
